# Supplementary figures and images for: In Vitro Fermentation of Polysaccharide from Edible Alga Enteromorpha clathrata by the Gut Microbiota of Patients with Ulcerative Colitis
Source: MDPI journal article supplement (doi:10.3390/nu15194122), 2023-09-24

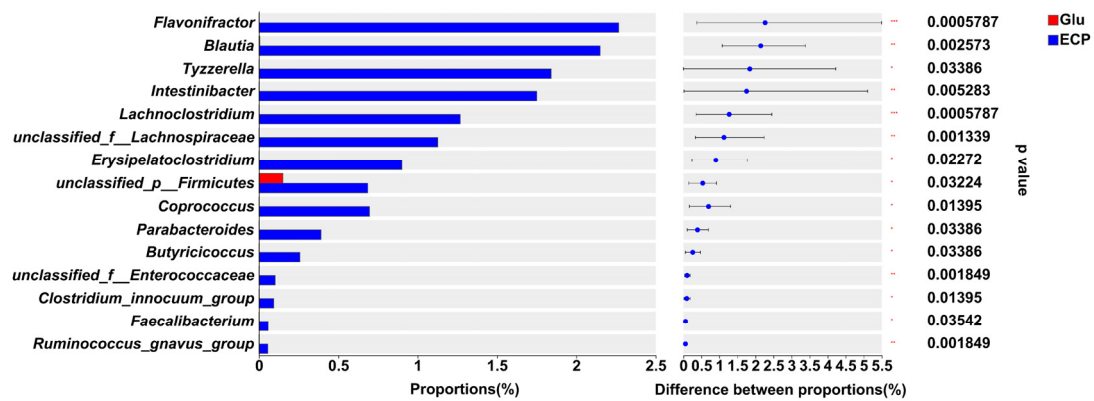

Figure S1. Wilcoxon rank-sum test analysis of the gut microbiota at the genus level.

Supplement: s1 [file s1]
